# Supplementary material for: Towards Water Soluble Mitochondria-Targeting Theranostic Osmium(II) Triazole-Based Complexes
Source: PubMed Central journal article supplement (PMC6273092; doi:10.3390/molecules21101382), 2016-10-18
Supplement: molecules-21-01382-s001.pdf [file molecules-21-01382-s001.pdf]

# Supplementary Materials: Towards Water Soluble Mitochondria-Targeting Theranostic Osmium(II) Triazole-Based Complexes

Salem A. E. Omar, Paul A. Scattergood, Luke K. McKenzie, Helen E. Bryant, Julia A. Weinstein and Paul I. P. Elliott

|               |                                                                                                       |      |
|---------------|-------------------------------------------------------------------------------------------------------|------|
| Figure S1     | $^1\text{H}$ -NMR spectrum of $[\text{Os}(\text{btzpy})_2][\text{PF}_6]_2$ ( <b>1</b> )               | S2   |
| Figure S2     | $^{13}\text{C}$ -NMR spectrum of $[\text{Os}(\text{btzpy})_2][\text{PF}_6]_2$ ( <b>1</b> )            | S3   |
| Figure S3     | ESI mass spectrum of $[\text{Os}(\text{btzpy})_2][\text{PF}_6]_2$ ( <b>1</b> )                        | S3   |
| Figure S4     | $^1\text{H}$ -NMR spectrum of $[\text{Os}(\text{btzpy})_2][\text{Cl}]_2$ ( <b>1<sup>Cl</sup></b> )    | S4   |
| Figure S5     | $^{13}\text{C}$ -NMR spectrum of $[\text{Os}(\text{btzpy})_2][\text{Cl}]_2$ ( <b>1<sup>Cl</sup></b> ) | S4   |
| Figure S6     | ESI mass spectrum of $[\text{Os}(\text{btzpy})_2][\text{Cl}]_2$ ( <b>1<sup>Cl</sup></b> )             | S5   |
| DFT optimised | ground and triplet state geometries for complex $[\text{Os}(\text{btzpy})_2]^{2+}$                    | S5–7 |
| Figure S7     | TDDFT spectrum for $[\text{Os}(\text{btzpy})_2]^{2+}$                                                 | S7   |
| Table S1      | Summary of TDDFT vertical excitation data for $[\text{Os}(\text{btzpy})_2]^{2+}$                      | S8   |

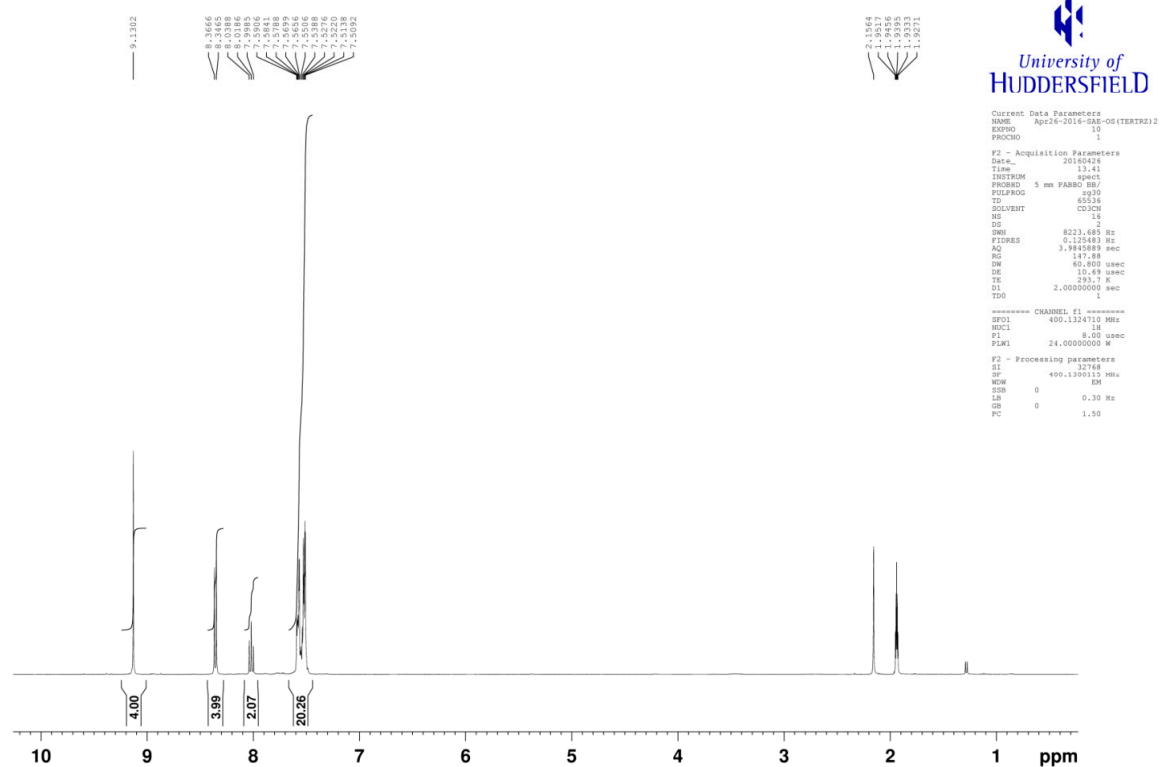Figure S1.  $^1\text{H-NMR}$  (400 MHz,  $d_3\text{-MeCN}$ ) spectrum of **1**.

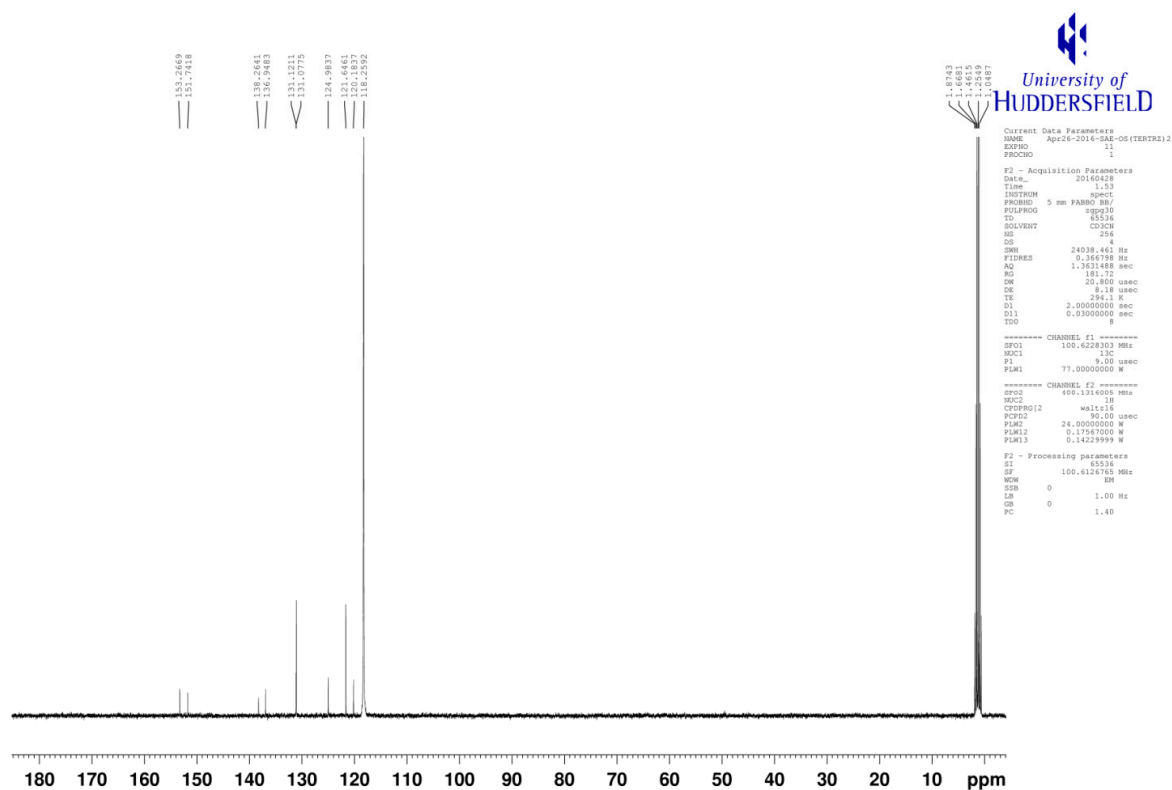

Figure S2.  $^{13}\text{C}$ -NMR (101 MHz,  $d_3$ -MeCN) spectrum of **1**.

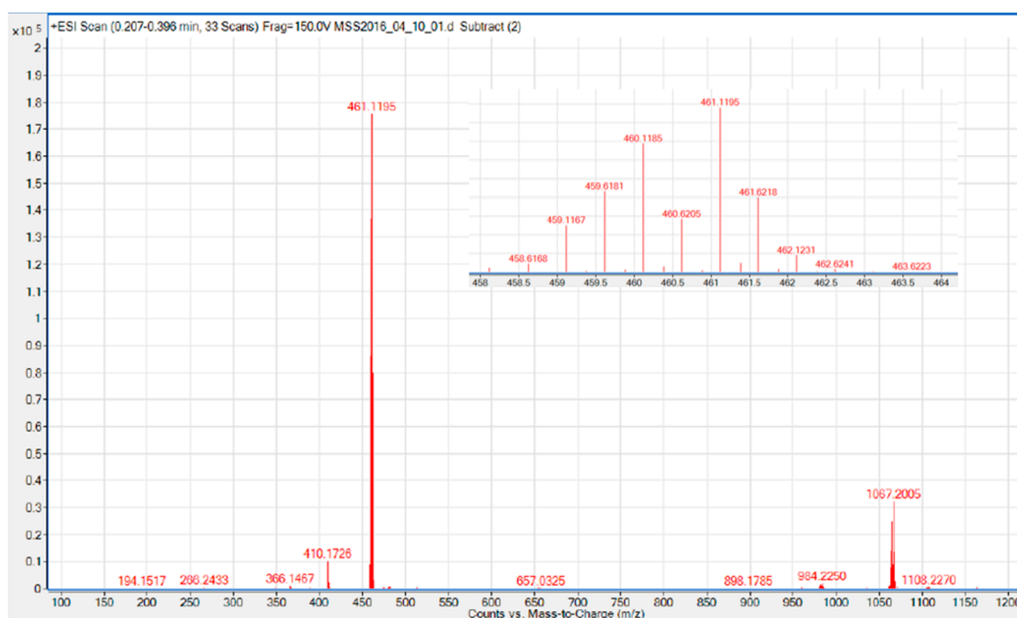

Figure S3. High resolution ESI mass spectrum for **1**. The expansion shows detail of the  $[\text{C}_{42}\text{H}_{30}\text{N}_{14}\text{Os}]^{2+}$  mass fragment. The cationic ion pair  $\{[\text{C}_{42}\text{H}_{30}\text{N}_{14}\text{Os}][\text{PF}_6]\}^+$  is also observed at  $m/z = 1067.2005$ .

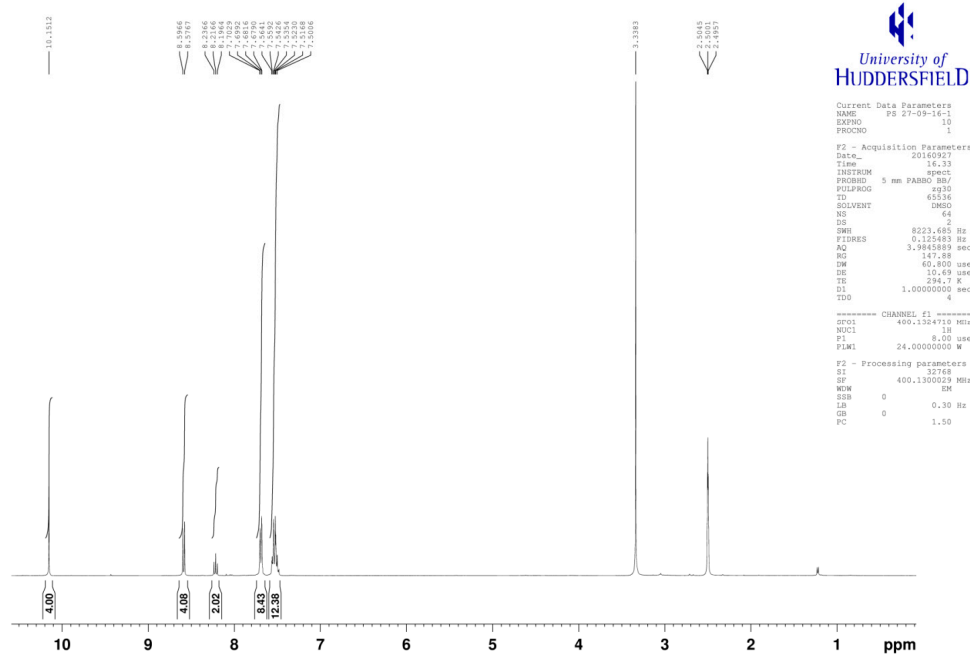Figure S4.  $^1\text{H}$ -NMR (400 MHz,  $d_6$ -DMSO) spectrum of  $1\text{Cl}$ .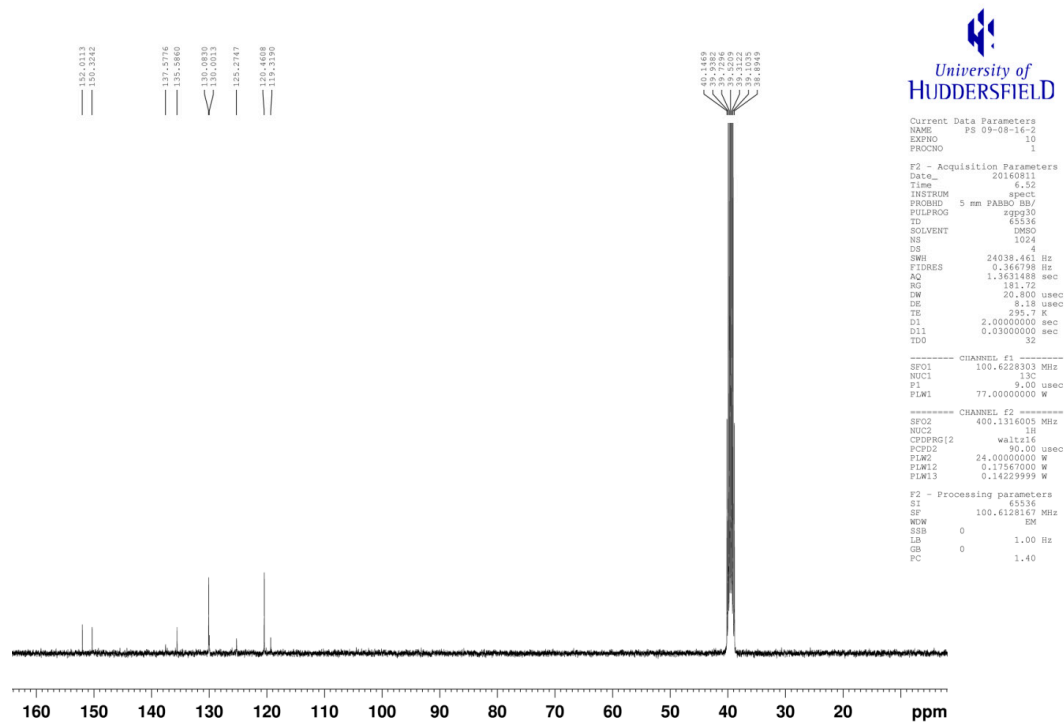Figure S5.  $^{13}\text{C}$ -NMR (101 MHz,  $d_6$ -DMSO) spectrum of  $1\text{Cl}$ .

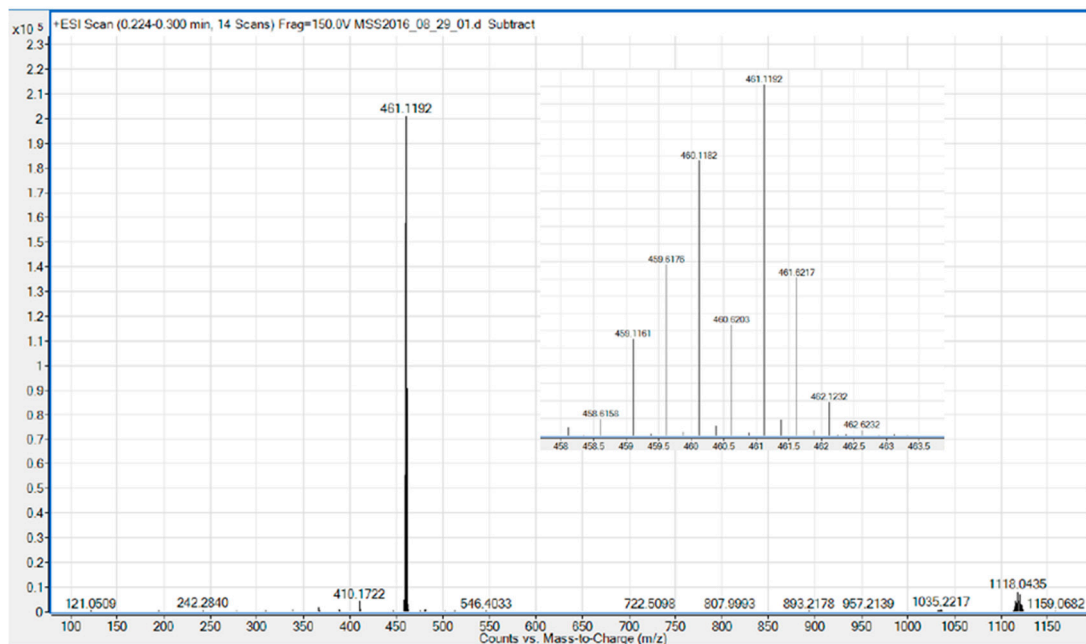

**Figure S6.** High resolution ESI mass spectrum for  $1^{\text{Cl}}$ . The expansion shows detail of the  $[\text{C}_{42}\text{H}_{30}\text{N}_{14}\text{Os}]^{2+}$  mass fragment.

XYZ coordinates for optimised ground state geometry of  $[\text{Os}(\text{btzpy})_2]^{2+}$  59 geometry

|    | X           | Y           | Z           |
|----|-------------|-------------|-------------|
| Os | 0.00037831  | -0.00001671 | -0.00008369 |
| N  | 1.48264883  | -0.12295165 | 1.46999247  |
| N  | 2.29736703  | 0.72406015  | 2.03942651  |
| N  | 3.01804563  | 0.01669161  | 2.91790722  |
| C  | 2.66892556  | -1.2899966  | 2.91845714  |
| C  | 1.66756779  | -1.39534131 | 1.97744192  |
| C  | 0.83097035  | -2.46139716 | 1.44131815  |
| N  | -0.02359735 | -1.99876293 | 0.49370528  |
| C  | -0.89294883 | -2.8312213  | -0.13359452 |
| C  | -1.71035973 | -2.12010421 | -1.1087362  |
| C  | -2.71344175 | -2.44521485 | -1.99516912 |
| N  | -3.03515725 | -1.28169018 | -2.60671588 |
| N  | -2.29531113 | -0.26179738 | -2.15431557 |
| N  | -1.49580768 | -0.76177555 | -1.25178148 |
| C  | 0.83438869  | -3.80830032 | 1.79238141  |
| C  | -0.05396724 | -4.67170946 | 1.15434565  |
| C  | -0.92723986 | -4.18602293 | 0.1828913   |
| C  | 4.02704546  | 0.69206609  | 3.73684752  |
| C  | -4.04369914 | -1.04996694 | -3.64359979 |
| N  | 1.40189648  | 0.06726901  | -1.55078507 |
| N  | 2.1491102   | -0.81016009 | -2.16499462 |
| N  | 2.8448869   | -0.13045263 | -3.08442634 |
| C  | 2.54785027  | 1.18891361  | -3.06603382 |
| C  | 1.60696958  | 1.33210683  | -2.06924251 |
| C  | 0.84342458  | 2.4290595   | -1.48830074 |
| N  | 0.02594091  | 1.99869016  | -0.49392353 |
| C  | -0.77423249 | 2.86336333  | 0.18009887  |
| C  | -1.56260154 | 2.18323509  | 1.20020895  |
| C  | -2.50222493 | 2.54560248  | 2.1401122   |
| N  | -2.83440401 | 1.39456286  | 2.76942337  |
| N  | -2.1599621  | 0.34759072  | 2.27830621  |
| N  | -1.39285411 | 0.81750203  | 1.33253247  |

|   | X           | Y           | Z           |
|---|-------------|-------------|-------------|
| C | 0.87924764  | 3.77524191  | -1.84032893 |
| C | 0.06191062  | 4.67156629  | -1.1545342  |
| C | -0.77384617 | 4.2188361   | -0.13534276 |
| C | 3.78516365  | -0.84230102 | -3.95277932 |
| C | -3.78729148 | 1.20164495  | 3.86520168  |
| H | 3.14114267  | -2.01380642 | 3.56208934  |
| H | -3.20468181 | -3.37537268 | -2.23020295 |
| H | 1.51582873  | -4.17892157 | 2.54848559  |
| H | -0.06585776 | -5.72345311 | 1.41424004  |
| H | -1.6205536  | -4.85138372 | -0.31712287 |
| H | 4.5550336   | -0.05648754 | 4.32314467  |
| H | 3.54009097  | 1.40462658  | 4.40112195  |
| H | -4.02379283 | 0.00872691  | -3.88756102 |
| H | -5.02918396 | -1.32372633 | -3.26805246 |
| H | 3.01028169  | 1.89454266  | -3.73640209 |
| H | -2.94372618 | 3.49366728  | 2.40087242  |
| H | 1.53121642  | 4.12016332  | -2.63366341 |
| H | 0.07615963  | 5.72328718  | -1.41440255 |
| H | -1.41193161 | 4.90987606  | 0.40197644  |
| H | 3.24543538  | -1.58145116 | -4.5426841  |
| H | 4.26088583  | -0.12076665 | -4.61299764 |
| H | -3.8289726  | 0.13689908  | 4.07811661  |
| H | -4.77218191 | 1.5565091   | 3.56360409  |
| H | 4.72818758  | 1.21165081  | 3.08625597  |
| H | -3.80474771 | -1.63746502 | -4.52959181 |
| H | 4.53930127  | -1.33513133 | -3.34143677 |
| H | -3.44972652 | 1.74196887  | 4.7492682   |

XYZ coordinates for the optimised lowest lying triplet excited state of [Os(btzpy)<sub>2</sub>]<sup>2+</sup> 59 geometry

|    | X           | Y           | Z           |
|----|-------------|-------------|-------------|
| Os | 0.01845474  | 0.05781669  | 0.00311501  |
| N  | 1.487627    | -0.13390125 | 1.47527065  |
| N  | 2.30251278  | 0.7193301   | 2.03057555  |
| N  | 3.02865984  | 0.01763692  | 2.90468257  |
| C  | 2.68040783  | -1.28961336 | 2.91656835  |
| C  | 1.67215299  | -1.40155498 | 1.983473    |
| C  | 0.83114242  | -2.46335998 | 1.446889    |
| N  | -0.02039133 | -1.99850151 | 0.50270458  |
| C  | -0.89027523 | -2.82323231 | -0.12465495 |
| C  | -1.70627285 | -2.11167488 | -1.10055267 |
| C  | -2.71220975 | -2.42962844 | -1.98703209 |
| N  | -3.0263115  | -1.26188092 | -2.59537426 |
| N  | -2.28126894 | -0.24978654 | -2.14299045 |
| N  | -1.4878702  | -0.75955324 | -1.24429782 |
| C  | 0.83193939  | -3.81007075 | 1.79844818  |
| C  | -0.05984851 | -4.66867977 | 1.15920366  |
| C  | -0.93108701 | -4.17901941 | 0.18856806  |
| C  | 4.02308557  | 0.70537757  | 3.73505074  |
| C  | -4.02978959 | -1.01971962 | -3.63779239 |
| N  | 1.41894882  | 0.08266841  | -1.56374972 |
| N  | 2.18263713  | -0.81356737 | -2.14639259 |
| N  | 2.86850636  | -0.15426764 | -3.07729122 |
| C  | 2.55698427  | 1.16405887  | -3.10825899 |
| C  | 1.60650924  | 1.33812164  | -2.1177948  |
| C  | 0.83631262  | 2.42666423  | -1.56528026 |
| N  | -0.0589103  | 1.96641059  | -0.57158615 |

|   | X           | Y           | Z           |
|---|-------------|-------------|-------------|
| C | -0.84669776 | 2.88026464  | 0.16755446  |
| C | -1.60737091 | 2.20561649  | 1.19160787  |
| C | -2.55424763 | 2.54094395  | 2.14287712  |
| N | -2.84150185 | 1.38214696  | 2.7854459   |
| N | -2.14628318 | 0.35372511  | 2.30527282  |
| N | -1.40038345 | 0.84358919  | 1.34240081  |
| C | 0.88743925  | 3.763787    | -1.86305922 |
| C | 0.05949259  | 4.67412968  | -1.1650922  |
| C | -0.79230857 | 4.2170422   | -0.1332031  |
| C | 3.79949331  | -0.88186826 | -3.94247632 |
| C | -3.78255495 | 1.17628266  | 3.88845911  |
| H | 3.1576729   | -2.0095593  | 3.56091616  |
| H | -3.20933686 | -3.35632013 | -2.2233939  |
| H | 1.51252787  | -4.18319503 | 2.55386396  |
| H | -0.07568169 | -5.72081876 | 1.41771876  |
| H | -1.62678045 | -4.84051918 | -0.31293626 |
| H | 4.73097551  | -0.02972337 | 4.11150259  |
| H | 3.52596791  | 1.20460159  | 4.56628225  |
| H | -4.03615131 | 0.04747465  | -3.84203218 |
| H | -5.00991856 | -1.33496388 | -3.28222831 |
| H | 3.01483209  | 1.84808     | -3.80306851 |
| H | -3.02719024 | 3.47405889  | 2.40056053  |
| H | 1.56562274  | 4.12857224  | -2.62598337 |
| H | 0.09807315  | 5.72877853  | -1.40382789 |
| H | -1.39408277 | 4.92708645  | 0.42251583  |
| H | 3.24273948  | -1.48723282 | -4.65707507 |
| H | 4.41676614  | -0.16036098 | -4.4728357  |
| H | -3.77765799 | 0.11724956  | 4.13150312  |
| H | -4.78238445 | 1.48047899  | 3.58042375  |
| H | 4.5417356   | 1.43634042  | 3.11924542  |
| H | -3.76241636 | -1.56836439 | -4.54030406 |
| H | 4.42860114  | -1.52107094 | -3.3266109  |
| H | -3.46763749 | 1.75644661  | 4.75544338  |

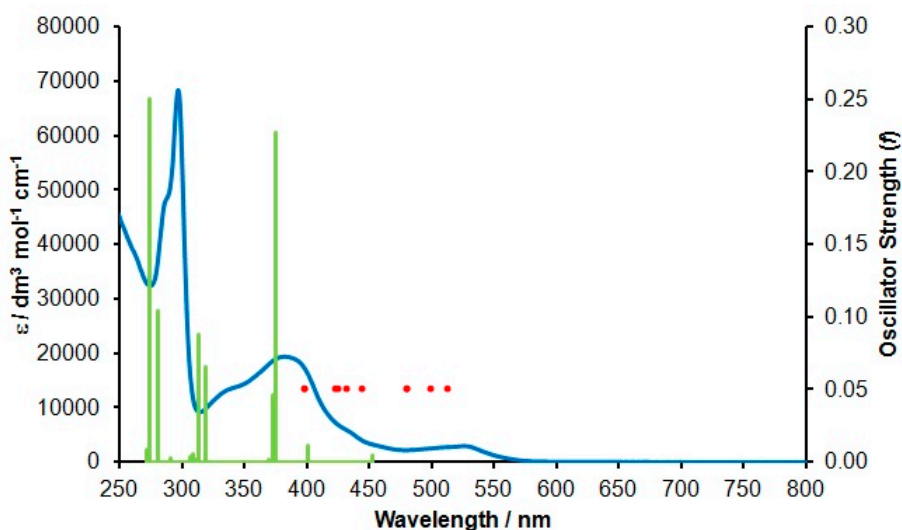

**Figure S7.** Simulated UV-visible absorption spectrum of  $[\text{Os}(\text{btzpy})_2]^{2+}$ : singlet vertical excitations from TDDFT calculations (green trace) with experimental spectrum overlaid (blue trace). Red dots indicate positions of calculated spin-forbidden direct triplet excitations.

**Table S1.** Summarised data for major singlet excitations and the three lowest energy triplet excitations from TDDFT calculations.

| State           | $\lambda/\text{nm}$ (Energy/eV) | Oscillator Strength ( <i>f</i> ) | Composition                                                           | Character         |
|-----------------|---------------------------------|----------------------------------|-----------------------------------------------------------------------|-------------------|
| S <sub>1</sub>  | 452 (2.74)                      | 0.004                            | HOMO → LUMO (96%)<br>HOMO → LUMO+2 (34%)                              | <sup>1</sup> MLCT |
| S <sub>7</sub>  | 374 (3.31)                      | 0.227                            | HOMO-2 → LUMO+1 (13%)<br>HOMO-1 → LUMO (13%)                          | <sup>1</sup> MLCT |
| S <sub>13</sub> | 319 (3.36)                      | 0.065                            | HOMO → LUMO+4 (88%)                                                   | <sup>1</sup> MLCT |
| S <sub>14</sub> | 313 (3.89)                      | 0.088                            | HOMO → LUMO+5 (88%)                                                   | <sup>1</sup> MLCT |
| S <sub>27</sub> | 274 (4.53)                      | 0.251                            | HOMO-4 → LUMO (63%)<br>HOMO-4 → LUMO+1 (15%)                          | <sup>1</sup> LC   |
| T <sub>1</sub>  | 512 (2.42)                      | -                                | HOMO-2 → LUMO+1 (44%)<br>HOMO-1 → LUMO (44%)<br>HOMO-2 → LUMO+1 (25%) | <sup>3</sup> MLCT |
| T <sub>2</sub>  | 499 (2.48)                      | -                                | HOMO-1 → LUMO (25%)<br>HOMO-2 → LUMO (21%)<br>HOMO-1 → LUMO+1 (21%)   | <sup>3</sup> MLCT |
| T <sub>3</sub>  | 480 (2.58)                      | -                                | HOMO → LUMO (76%)<br>HOMO → LUMO+1 (20%)                              | <sup>3</sup> MLCT |
